# Supplementary material for: Dimorphic life cycle through transverse division in burrowing hard corals
Source: Research Square preprint supplement (doi:10.21203/rs.3.rs-1461084/v1), 2022-03-28
Supplement: Supplementary file 1 [file d1523966da0440665defd662.xlsx]

## Sheet: Sheet1
Supplementary Table S1. A list of GenBank accession numbers of genes used in our phylogenetic analyses.
Family name	species name	Region	Accession No.
Acroporidae	Acropora digitifera	Complete Mitochondrial Genome	KF448535
Acroporidae	Acropora florida	Complete Mitochondrial Genome	KF448533
Astrocoeniidae	Stephanocoenia michelinii	28S rRNA	EU262805
Caryophylliidae	Caryophyllia sarsiae	28S rRNA	MT280763
Caryophylliidae	Coenocyathus sp.	28S rRNA	MT127562
Caryophylliidae	Desmophyllum dianthus	Complete Mitochondrial Genome	KX000893
Caryophylliidae	Desmophyllum pertusum	Complete Mitochondrial Genome	KC875348
Caryophylliidae	Euphyllia ancora	Complete Mitochondrial Genome	NC015641
Caryophylliidae	Labyrinthocyathus facetus	28S rRNA	MT280775
Caryophylliidae	Paraconotrochus antarcticus	Complete Mitochondrial Genome	NC056275
Caryophylliidae	Polycyathus muellerae	28S rRNA	MT280777
Caryophylliidae	Solenosmilia variabilis	Complete Mitochondrial Genome	KM609293
Coscinaraeidae	Coscinaraea sp.	28S rRNA	EU262826
Dendrophylliidae	Balanophyllia desmophyllioides	28S rRNA	HQ439648
Dendrophylliidae	Balanophyllia regiaisolate	28S rRNA	EU262813
Dendrophylliidae	Balanophyllia sp.	28S rRNA	EU262855
Dendrophylliidae	Balanophyllia sp.	28S rRNA	HQ439651
Dendrophylliidae	Cladopsammia eguchii	ITS	HG965382
Dendrophylliidae	Cladopsammia eguchii	ITS	HG965383
Dendrophylliidae	Cladopsammia gracilis	28S rRNA	EU262774
Dendrophylliidae	Cladopsammia gracilis	ITS	HG965384
Dendrophylliidae	Cladopsammia gracilis	ITS	HG965385
Dendrophylliidae	Cladopsammia sp.	ITS	HG965380
Dendrophylliidae	Dendrophyllia arbuscula	Complete Mitochondrial Genome	NC_027590
Dendrophylliidae	Dendrophyllia arbuscula	ITS	HG965386
Dendrophylliidae	Dendrophyllia cribrosa	Complete Mitochondrial Genome	JQ290080
Dendrophylliidae	Dendrophyllia laboreli	28S rRNA	MT280765
Dendrophylliidae	Dendrophylliidae sp.	ITS	MN412647
Dendrophylliidae	Dendrophylliidae sp.	ITS	MN412648
Dendrophylliidae	Dendrophylliidae sp.	ITS	MN412650
Dendrophylliidae	Dendrophylliidae sp.	ITS	MN412652
Dendrophylliidae	Eguchipsammia serpentina	ITS	HG965392
Dendrophylliidae	Eguchipsammia serpentina	ITS	HG965393
Dendrophylliidae	Endopachys grayi	28S rRNA	HQ439655
Dendrophylliidae	Heteropsammia cochlea	ITS	HG965394
Dendrophylliidae	Heteropsammia cochlea	ITS	HG965395
Dendrophylliidae	Heteropsammia sp.	28S rRNA	EU262866
Dendrophylliidae	Rhizopsammia cf. verrilli	ITS	HG965399
Dendrophylliidae	Rhizopsammia wettsteini	28S rRNA	MT280779
Dendrophylliidae	Tubastraea aurea	ITS	AY722796
Dendrophylliidae	Tubastraea coccinea	Complete Mitochondrial Genome	KX024566
Dendrophylliidae	Tubastraea coccinea	28S rRNA	EU262854
Dendrophylliidae	Tubastraea coccinea	28S rRNA	MT280786
Dendrophylliidae	Tubastraea coccinea	ITS	HG965410
Dendrophylliidae	Tubastraea coccinea	ITS	HG965411
Dendrophylliidae	Tubastraea diaphana	Complete Mitochondrial Genome	NC_056884
Dendrophylliidae	Tubastraea diaphana	ITS	HG965413
Dendrophylliidae	Tubastraea sp.	ITS	HG965423
Dendrophylliidae	Tubastraea sp.	ITS	HG965424
Dendrophylliidae	Tubastraea sp.	ITS	MW415890
Dendrophylliidae	Tubastraea sp.	ITS	MW415891
Dendrophylliidae	Turbinaria irregularis	28S rRNA	JQ966136
Dendrophylliidae	Turbinaria peltata	28S rRNA	JQ966131
Dendrophylliidae	Turbinaria peltata	Complete Mitochondrial Genome	NC_024671
Dendrophylliidae	Turbinaria sp.	28S rRNA	KY798869
Faviina incertae sedis	Leptastrea bottae	ITS	MK527048
Faviina incertae sedis	Leptastrea bottae	ITS	MK527049
Faviina incertae sedis	Leptastrea bottae	ITS	MK527051
Faviina incertae sedis	Leptastrea bottae	ITS	MK527052
Faviina incertae sedis	Leptastrea purpurea	28S rRNA	JQ966139
Faviina incertae sedis	Solenastrea bournoni	ITS	AB441399
Flabellidae	Flabellum curvatum	28S rRNA	EU262783
Flabellidae	Javania borealis	28S rRNA	MT280774
Flabellidae	Polymyces wellsi	28S rRNA	MT280778
Fungiidae	Heliofungia actiniformis	28S rRNA	EU262775
Fungiidae	Herpolithaz sp.	28S rRNA	EU262811
Fungiidae	Lithophyllon scabra	ITS	LC191515
Fungiidae	Polyphyllia sp.	28S rRNA	EU262880
Fungiidae	Sandalolitha robusta	ITS	AB441411
Fungiidae	Sandalolitha sp.	28S rRNA	EU262857
Fungiidae	Zoopilus echinatus	28S rRNA	EU262870
Gardineriidae	Gardineria hawaiiensis	Complete Mitochondrial Genome	NC_056290
Gardineriidae	Gardineria hawaiiensis	28S rRNA	GQ868673
Meandrinidae	Meandrina meandrites	ITS	MK491668
Meandrinidae	Meandrina meandrites	ITS	MK491669
Meandrinidae	Meandrina meandrites	ITS	MK491670
Meandrinidae	Montastraea franksi	28S rRNA	AY026375
Merulinidae	Echinopora lamellosa	28S rRNA	EU262773
Micrabaciidae	Leptopsammia pruvoti	28S rRNA	EU262851
Micrabaciidae	Rhombopsammia niphada	28S rRNA	GQ868674
Oulastreidae	Oulastrea crispata	28S rRNA	JQ966134
Oulastreidae	Oulastrea sp.	28S rRNA	JQ966152
Plesiastreidae	Plesiastrea versipora	28S rRNA	HQ203397
Plesiastreidae	Plesiastrea versipora	28S rRNA	HQ203398
Pocilloporidae	Pocillopora damicornis	Complete Mitochondrial Genome	EF526302
Pocilloporidae	Pocillopora eydouxi	Complete Mitochondrial Genome	EF526303
Pocilloporidae	Seriatopora caliendrum	Complete Mitochondrial Genome	EF633601
Pocilloporidae	Seriatopora hystrix	Complete Mitochondrial Genome	EF633600
Poritidae	Porites okinawensis	Complete Mitochondrial Genome	JF825142
Poritidae	Porites porites	Complete Mitochondrial Genome	DQ643837
Siderastreidae	Psammocora contigua	ITS	AY722783
Turbinoliidae	Cyathotrochus pileus	16S rRNA	HQ439764
Turbinoliidae	Cyathotrochus pileus	COI	HM018623
Turbinoliidae	Cyathotrochus pileus	28S rRNA	HQ439682
Turbinoliidae	Deltocyathoides orientalis (501)	16S rDNA	LC685950
Turbinoliidae	Deltocyathoides orientalis (501)	28S rRNA	LC685958
Turbinoliidae	Deltocyathoides orientalis (501)	COI	LC686137
Turbinoliidae	Deltocyathoides orientalis (501)	ITS	LC686129
Turbinoliidae	Deltocyathoides orientalis (502)	12S rRNA	LC685944
Turbinoliidae	Deltocyathoides orientalis (502)	16S rRNA	LC685951
Turbinoliidae	Deltocyathoides orientalis (502)	28S rRNA	LC685959
Turbinoliidae	Deltocyathoides orientalis (502)	COI	LC686138
Turbinoliidae	Deltocyathoides orientalis (502)	ITS	LC686130
Turbinoliidae	Deltocyathoides orientalis (503)	12S rRNA	LC685945
Turbinoliidae	Deltocyathoides orientalis (503)	16S rRNA	LC685952
Turbinoliidae	Deltocyathoides orientalis (503)	28S rRNA	LC685960
Turbinoliidae	Deltocyathoides orientalis (503)	COI	LC686139
Turbinoliidae	Deltocyathoides orientalis (503)	ITS	LC686131
Turbinoliidae	Deltocyathoides orientalis (504)	12S rRNA	LC685946
Turbinoliidae	Deltocyathoides orientalis (504)	16S rRNA	LC685953
Turbinoliidae	Deltocyathoides orientalis (504)	28S rRNA	LC685961
Turbinoliidae	Deltocyathoides orientalis (504)	COI	LC686140
Turbinoliidae	Deltocyathoides orientalis (504)	ITS	LC686132
Turbinoliidae	Deltocyathoides orientalis (505)	16S rRNA	LC685954
Turbinoliidae	Deltocyathoides orientalis (505)	28S rRNA	LC685962
Turbinoliidae	Deltocyathoides orientalis (505)	COI	LC686141
Turbinoliidae	Deltocyathoides orientalis (505)	ITS	LC686133
Turbinoliidae	Deltocyathoides orientalis (506)	12S rRNA	LC685947
Turbinoliidae	Deltocyathoides orientalis (506)	16S rRNA	LC685955
Turbinoliidae	Deltocyathoides orientalis (506)	28S rRNA	LC685963
Turbinoliidae	Deltocyathoides orientalis (506)	COI	LC686142
Turbinoliidae	Deltocyathoides orientalis (506)	ITS	LC686134
Turbinoliidae	Deltocyathoides orientalis (507)	12S rRNA	LC685948
Turbinoliidae	Deltocyathoides orientalis (507)	16S rRNA	LC685956
Turbinoliidae	Deltocyathoides orientalis (507)	28S rRNA	LC685964
Turbinoliidae	Deltocyathoides orientalis (507)	COI	LC686143
Turbinoliidae	Deltocyathoides orientalis (507)	ITS	LC686135
Turbinoliidae	Deltocyathoides orientalis (508)	12S rRNA	LC685949
Turbinoliidae	Deltocyathoides orientalis (508)	16S rRNA	LC685957
Turbinoliidae	Deltocyathoides orientalis (508)	28S rRNA	LC685965
Turbinoliidae	Deltocyathoides orientalis (508)	COI	LC686144
Turbinoliidae	Deltocyathoides orientalis (508)	ITS	LC686136
Turbinoliidae	Notocyathus sp.	28S rRNA	EU262782
Turbinoliidae	Notocyathus sp.	12S rRNA	EF597061
Turbinoliidae	Tropidocyathus labidus	12S rRNA	EF597062
Turbinoliidae	Tropidocyathus lessoni	16S rRNA	HQ439765
Turbinoliidae	Tropidocyathus lessoni	28S rRNA	HQ439683
Turbinoliidae	Tropidocyathus lessons	COI	HM018669
