# Supplementary material for: Dimorphic life cycle through transverse division in burrowing hard corals
Source: Research Square preprint supplement (doi:10.21203/rs.3.rs-1461084/v1), 2022-03-28
Supplement: Supplementary file 2 [file ff9d649f1bf21c7d07e9f6e9.xlsx]

## Sheet: Sheet1
Supplementary Table S3. A result table of Kolmogorov-Smirnov test
Sample	N	D-value	p-value
GCD of Anthocyathu without GBSD	30	0.18492	0.2565
GCD of Anthocyathu with GBSD	42	0.096888	0.8253
GBSD of Anthocyathu	42	0.10226	0.772
GCD of Anthocaulu	11	0.11263	0.999
